# Supplementary material for: Cadmium-rich intermetallic phases ARh2Cd20 – structure, magnetic behavior, 151Eu Mössbauer and 113Cd solid-state NMR spectroscopy
Source: Royal Society of Chemistry journal article supplement (doi:10.1039/d4dt03523b), 2025-01-01
Supplement: d4dt03523b1.pdf [file d4dt03523b1.pdf]

## Electronic Supplementary Information

### Cadmium-rich intermetallic phases $ARh_2Cd_{20}$ – Structure, magnetic behavior, $^{151}\text{Eu}$ Mössbauer and $^{113}\text{Cd}$ solid-state NMR spectroscopy

Lars Schumacher<sup>a</sup>, Florian Schreiner<sup>b</sup>, Aylin Koldemir<sup>a</sup>, Oliver Janka<sup>c</sup>, Michael Ryan Hansen<sup>b</sup> and Rainer Pöttgen<sup>\*a</sup>

<sup>a</sup> *Institut für Anorganische und Analytische Chemie, Universität Münster, Corrensstraße 30, 48149 Münster, Germany. E-mail: pottgen@uni-muenster.de*

<sup>b</sup> *Institut für Physikalische Chemie, Universität Münster, Corrensstrasse 30, D-48149 Münster, Germany*

<sup>c</sup> *Universität des Saarlandes, Anorganische Festkörperchemie, Campus C4 1, 66123 Saarbrücken, Germany*

|        |                     |                     |
|--------|---------------------|---------------------|
| ORCID: | Lars Schumacher     | 0009-0009-9444-8773 |
|        | Florian Schreiner   | 0009-0007-4486-7940 |
|        | Michael Ryan Hansen | 0000-0001-7114-8051 |
|        | Aylin Koldemir      | 0009-0004-3819-3853 |
|        | Oliver Janka        | 0000-0002-9480-3888 |
|        | Rainer Pöttgen      | 0000-0003-0962-279X |

***Received ## December 2024, Accepted ## ##### 2025***

**DOI: #####**

**Table S1** Experimental parameters for the static WCPMG and WCPMG-MAS NMR experiments.<sup>a</sup>

| Sample                             | Nucleus           | $\tau$ / $\mu$ s | $\Omega$ / MHz | $N$ | $NS$  | $d_1$ / s | $\nu_{\text{MAS}}$ / kHz | $n_{\text{rot}}$ | Echoes recorded | Echoes processed |
|------------------------------------|-------------------|------------------|----------------|-----|-------|-----------|--------------------------|------------------|-----------------|------------------|
|                                    |                   |                  |                |     |       |           |                          |                  | d               | d                |
| YRh <sub>2</sub> Cd <sub>20</sub>  | <sup>89</sup> Y   | 150              | 0.5            | 80  | 512   | 32.0      | —                        | —                | 128             | 64               |
|                                    | <sup>103</sup> Rh | 500              | 0.4            | 80  | 32768 | 2.0       | —                        | —                | 80              | 80               |
|                                    | <sup>113</sup> Cd | 50               | 0.5            | 80  | 2048  | 8.0       | 12.5                     | 9                | 80              | 12               |
| LaRh <sub>2</sub> Cd <sub>20</sub> | <sup>103</sup> Rh | 500              | 0.4            | 80  | 32768 | 2.0       | —                        | —                | 80              | 80               |
|                                    | <sup>113</sup> Cd | 50               | 0.5            | 80  | 32768 | 2.0       | 10.0                     | 7                | 80              | 12               |
|                                    | <sup>113</sup> Cd | 50               | 0.5            | 80  | 8192  | 8.0       | 12.5                     | 7                | 80              | 12               |
| YbRh <sub>2</sub> Cd <sub>20</sub> | <sup>171</sup> Yb | 50               | 1.0            | 40  | 10240 | 6.0       | —                        | —                | 80              | 20               |
|                                    | <sup>103</sup> Rh | 500              | 0.4            | 80  | 32768 | 2.0       | —                        | —                | 80              | 80               |
|                                    | <sup>113</sup> Cd | 50               | 0.5            | 80  | 2048  | 8.0       | 12.5                     | 9                | 80              | 12               |

<sup>a</sup> The listed parameters correspond to: pulse length  $\tau$ , WURST sweep width  $\Omega$ , WURST shape parameter  $N$ , number of scans  $NS$ , recycle delay  $d_1$ , number of acquired echoes as well as number of processed echoes, and in the case of WCPMG-MAS experiments, MAS frequency  $\nu_{\text{MAS}}$  and number of rotor periods recorded per echo  $n_{\text{rot}}$ .

**Table S2** Lattice parameters and mass% of LaRh<sub>2</sub>Cd<sub>20</sub> and RhCd<sub>9+ $\delta$</sub>  for the first and second measurement. Standard deviations are given in parentheses.

| Compound                              | $a$ (pm)   | $V$ (nm <sup>3</sup> ) | mass%   |
|---------------------------------------|------------|------------------------|---------|
| <b>first measurement</b>              |            |                        |         |
| LaRh <sub>2</sub> Cd <sub>20</sub>    | 1565.22(1) | 3.8350                 | 69.3(2) |
| RhCd <sub>9+<math>\delta</math></sub> | 2008.88(4) | 8.1071                 | 30.7(2) |
| <b>second measurement</b>             |            |                        |         |
| LaRh <sub>2</sub> Cd <sub>20</sub>    | 1565.27(1) | 3.8350                 | 60.1(2) |
| RhCd <sub>9+<math>\delta</math></sub> | 2008.57(2) | 8.1033                 | 39.9(2) |

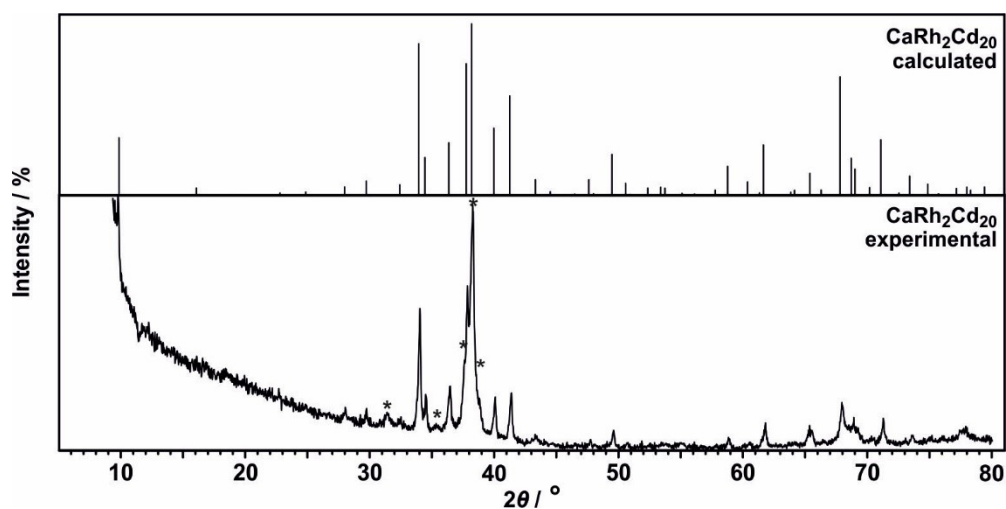

**Fig. S1** Calculated (top) and experimental (bottom) Guinier powder patterns ( $\text{CuK}\alpha_1$  radiation) of the  $\text{CaRh}_2\text{Cd}_{20}$  sample. Asterisks mark reflections from side-products.

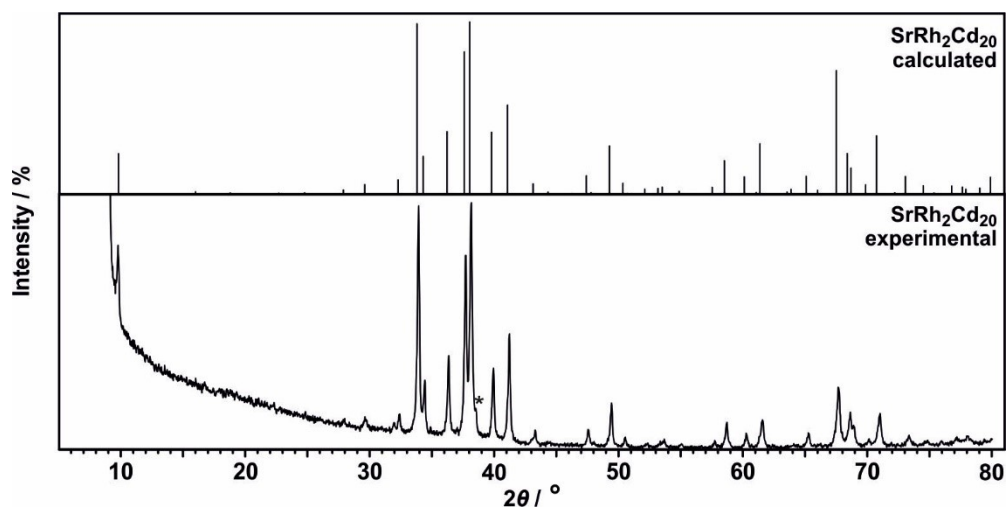

**Fig. S2** Calculated (top) and experimental (bottom) Guinier powder patterns ( $\text{CuK}\alpha_1$  radiation) of the  $\text{SrRh}_2\text{Cd}_{20}$  sample. Asterisks mark reflections from side-products.

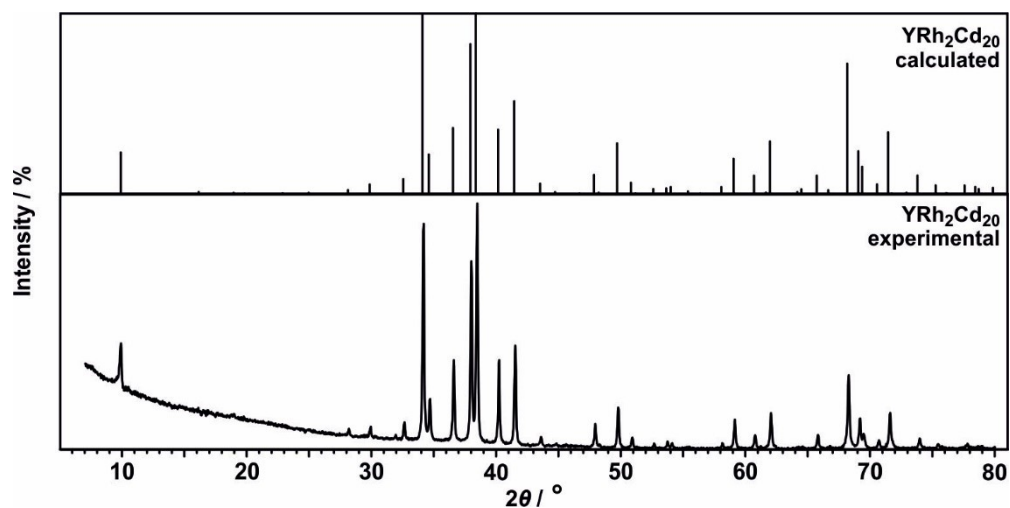

**Fig. S3** Calculated (top) and experimental (bottom) Guinier powder patterns ( $\text{CuK}\alpha_1$  radiation) of the  $\text{YRh}_2\text{Cd}_{20}$  sample.

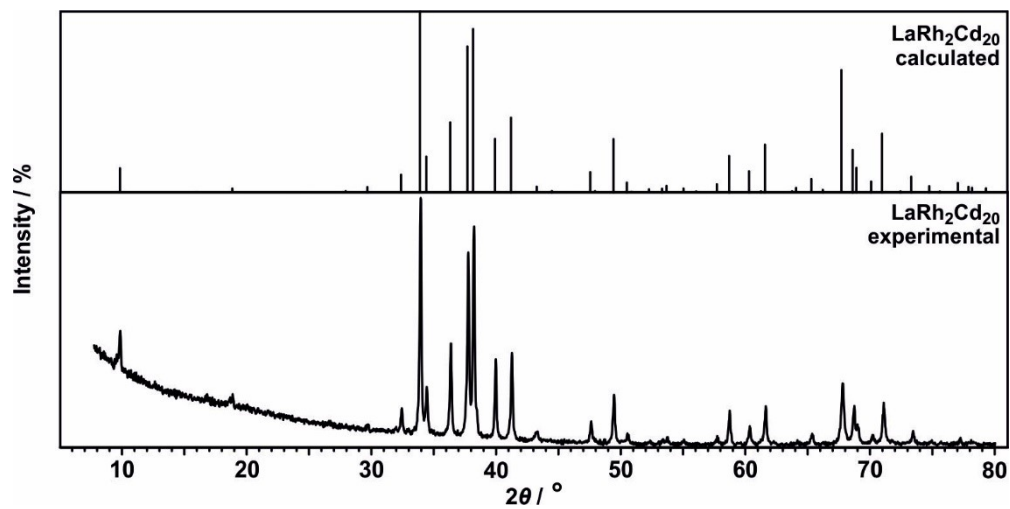

**Fig. S4** Calculated (top) and experimental (bottom) Guinier powder patterns ( $\text{CuK}\alpha_1$  radiation) of the  $\text{LaRh}_2\text{Cd}_{20}$  sample.

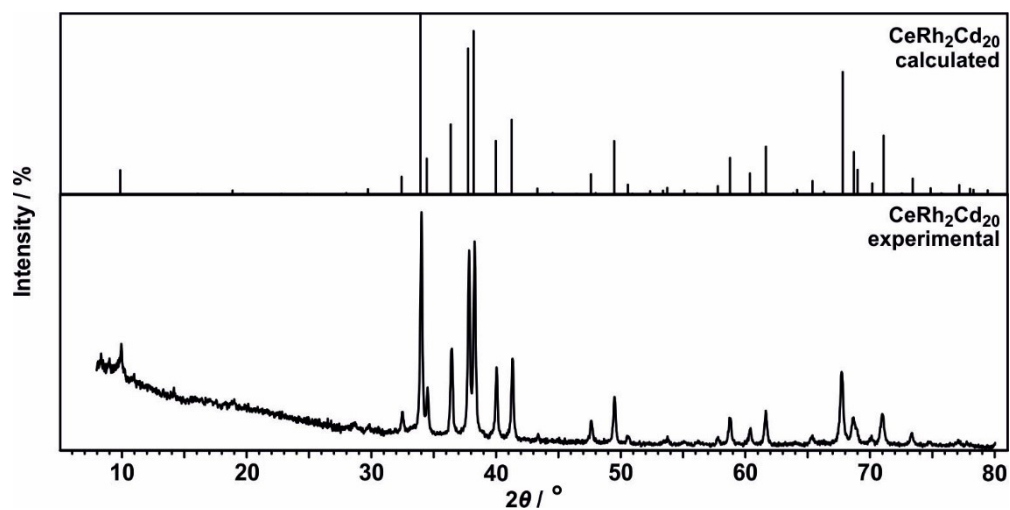

**Fig. S5** Calculated (top) and experimental (bottom) Guinier powder patterns ( $\text{CuK}\alpha_1$  radiation) of the  $\text{CeRh}_2\text{Cd}_{20}$  sample.

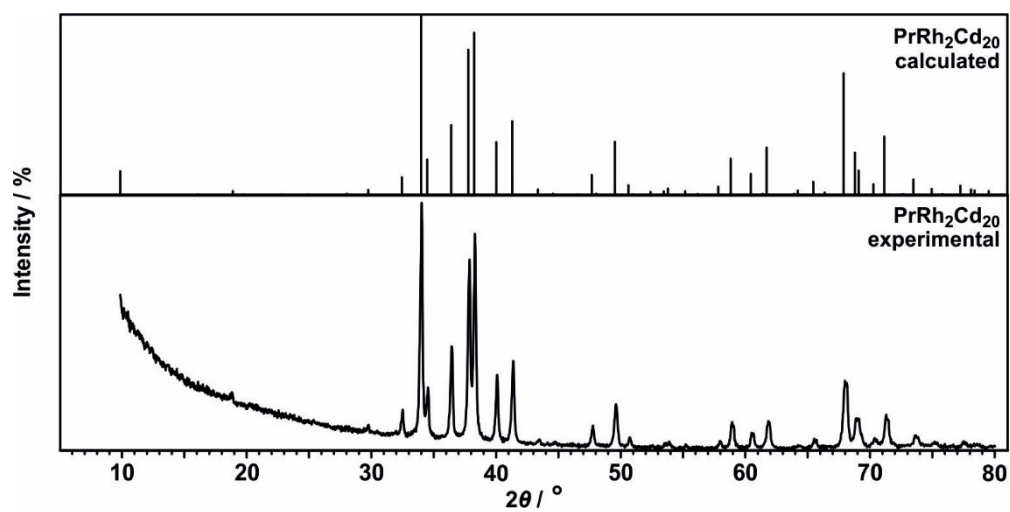

**Fig. S6** Calculated (top) and experimental (bottom) Guinier powder patterns ( $\text{CuK}\alpha_1$  radiation) of the  $\text{PrRh}_2\text{Cd}_{20}$  sample.

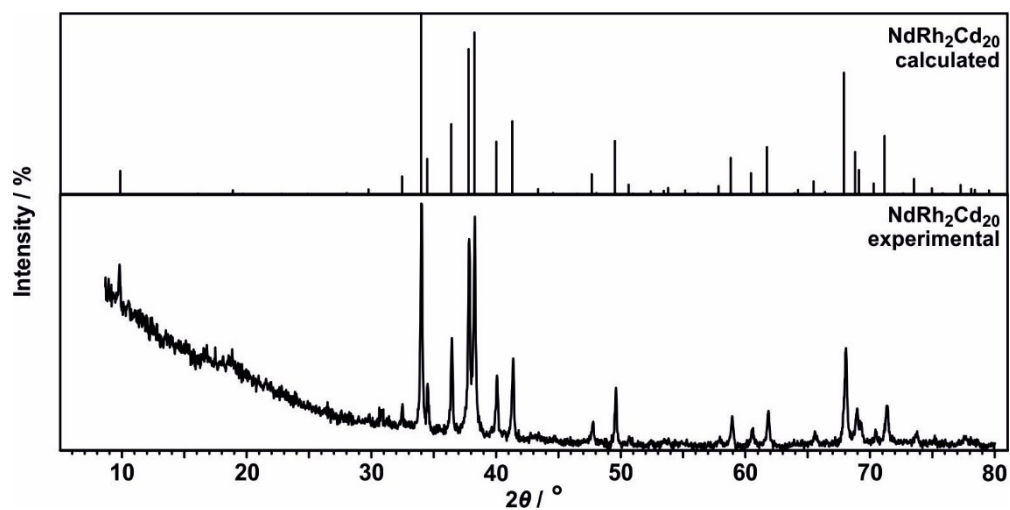

**Fig. S7** Calculated (top) and experimental (bottom) Guinier powder patterns ( $\text{CuK}\alpha_1$  radiation) of the  $\text{NdRh}_2\text{Cd}_{20}$  sample.

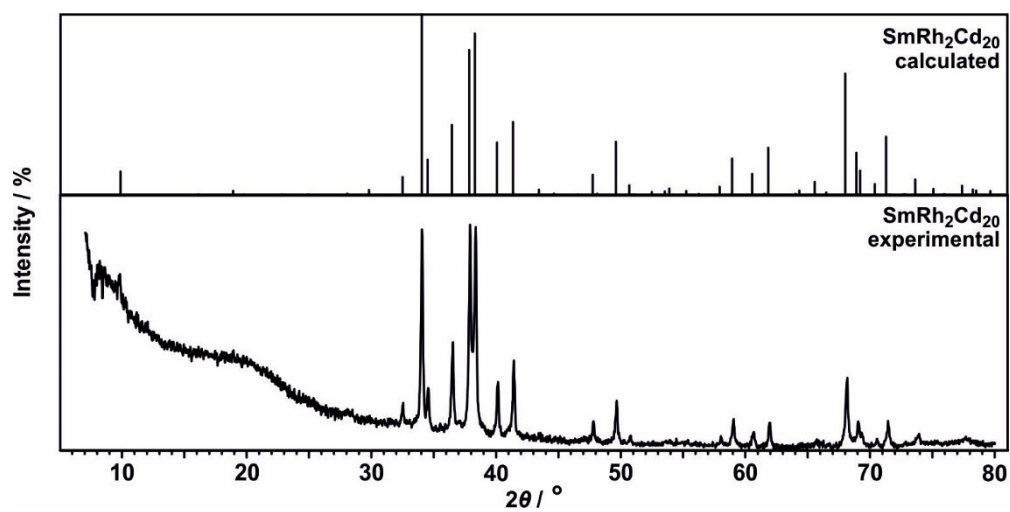

**Fig. S8** Calculated (top) and experimental (bottom) Guinier powder patterns ( $\text{CuK}\alpha_1$  radiation) of the  $\text{SmRh}_2\text{Cd}_{20}$  sample.

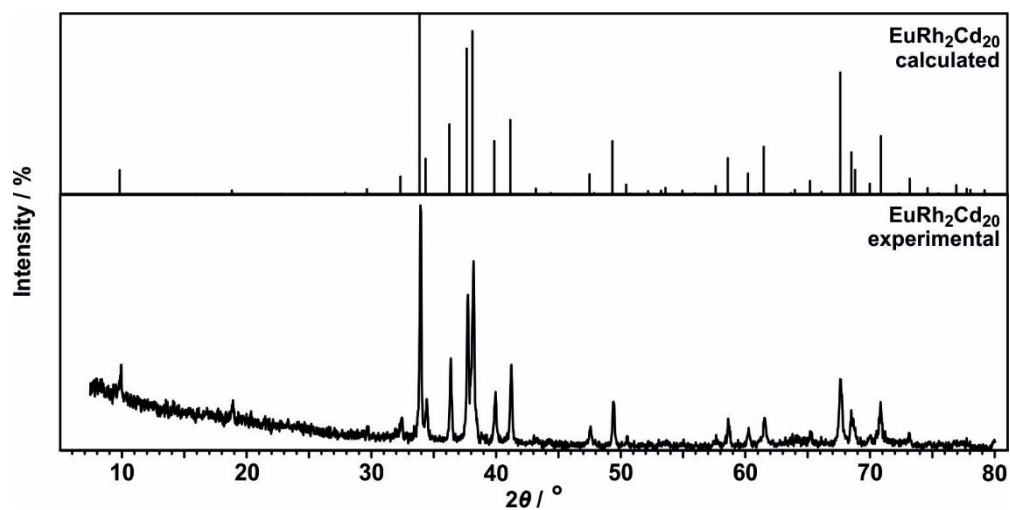

**Fig. S9** Calculated (top) and experimental (bottom) Guinier powder patterns ( $\text{CuK}\alpha_1$  radiation) of the  $\text{EuRh}_2\text{Cd}_{20}$  sample.

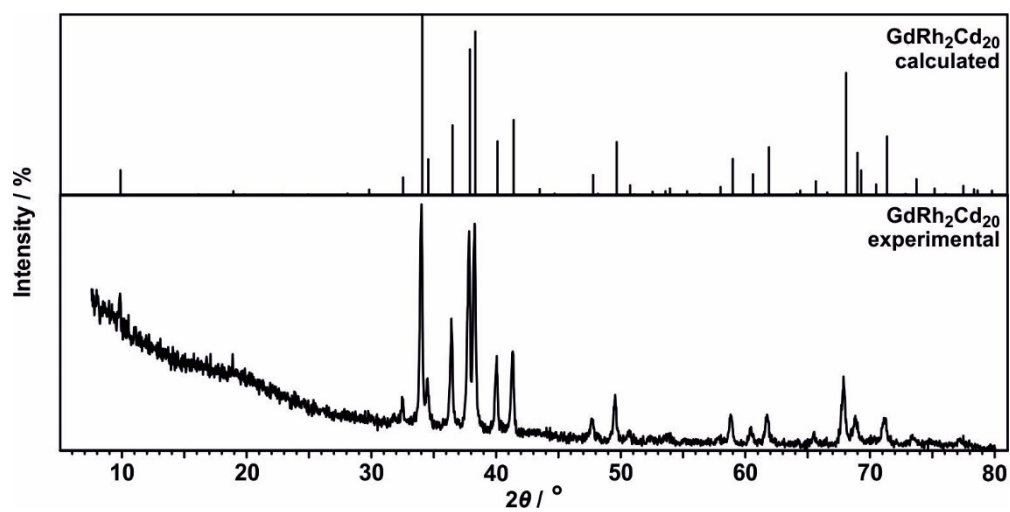

**Fig. S10** Calculated (top) and experimental (bottom) Guinier powder patterns ( $\text{CuK}\alpha_1$  radiation) of the  $\text{GdRh}_2\text{Cd}_{20}$  sample.

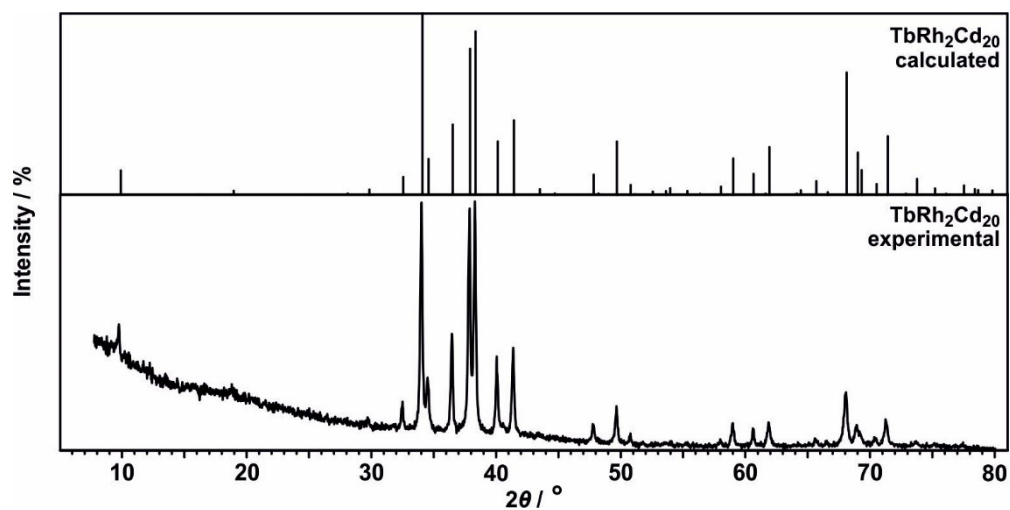

**Fig. S11** Calculated (top) and experimental (bottom) Guinier powder patterns ( $\text{CuK}\alpha_1$  radiation) of the  $\text{TbRh}_2\text{Cd}_{20}$  sample.

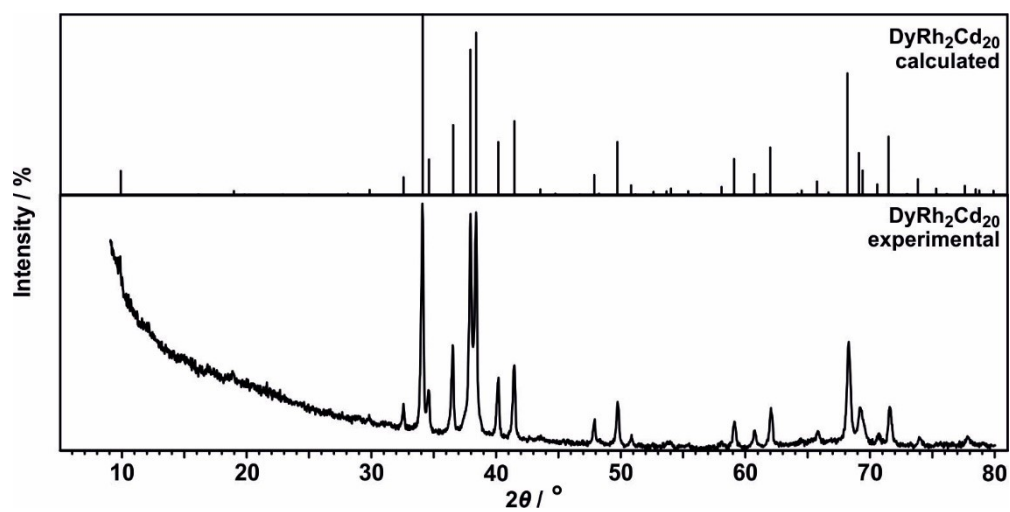

**Fig. S12** Calculated (top) and experimental (bottom) Guinier powder patterns ( $\text{CuK}\alpha_1$  radiation) of the  $\text{DyRh}_2\text{Cd}_{20}$  sample.



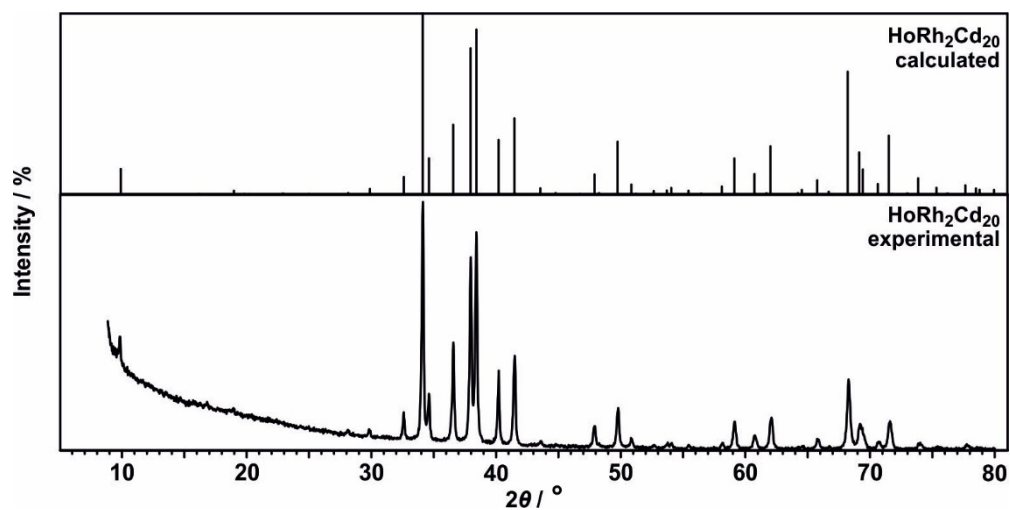

**Fig. S13** Calculated (top) and experimental (bottom) Guinier powder patterns ( $\text{CuK}\alpha_1$  radiation) of the  $\text{HoRh}_2\text{Cd}_{20}$  sample.

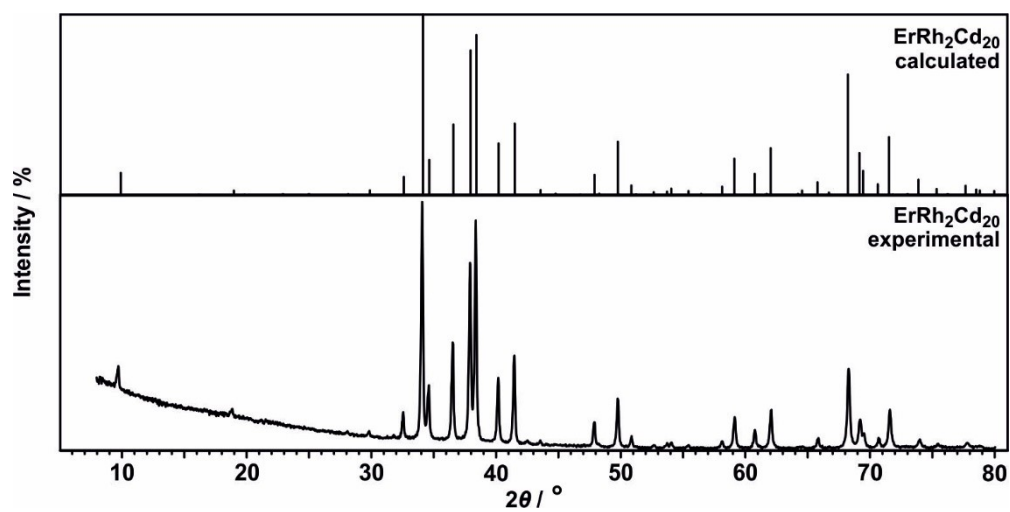

**Fig. S14** Calculated (top) and experimental (bottom) Guinier powder patterns ( $\text{CuK}\alpha_1$  radiation) of the  $\text{ErRh}_2\text{Cd}_{20}$  sample.

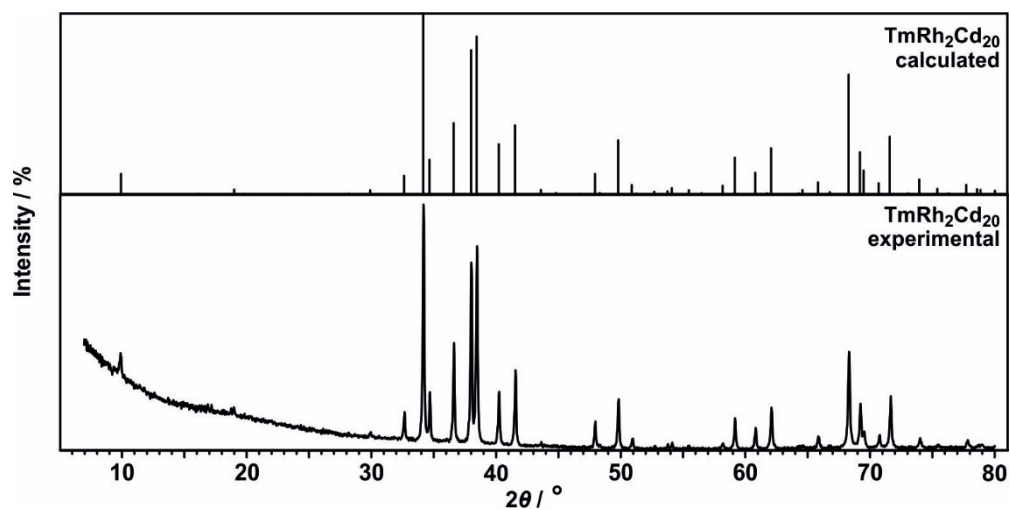

**Fig. S15** Calculated (top) and experimental (bottom) Guinier powder patterns ( $\text{CuK}\alpha_1$  radiation) of the  $\text{TmRh}_2\text{Cd}_{20}$  sample.

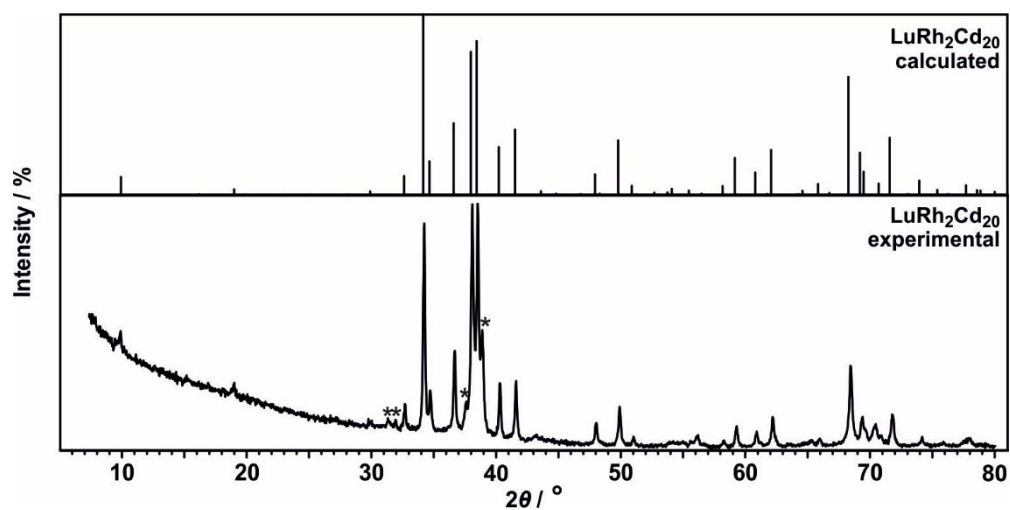

**Fig. S16** Calculated (top) and experimental (bottom) Guinier powder patterns ( $\text{CuK}\alpha_1$  radiation) of the  $\text{LuRh}_2\text{Cd}_{20}$  sample. Asterisks mark reflections from side-products.

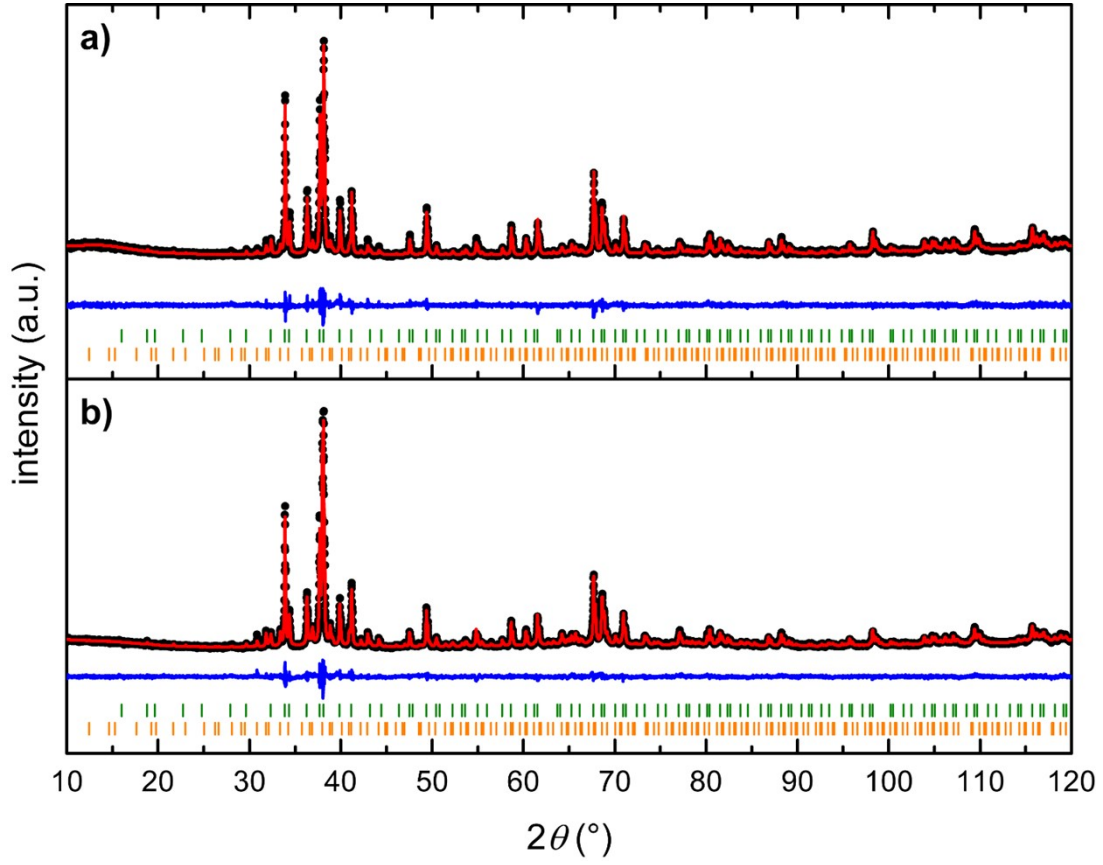

**Fig. S17** Rietveld refinements of  $\text{LaRh}_2\text{Cd}_{20}$ . (a) After approximately 4 weeks after preparation and (b) three weeks after recording the diffraction pattern shown in (a). Black points: experimental data, red line: refined pattern, blue line: difference experimental minus refined. Green dashes indicate the Bragg positions of  $\text{LaRh}_2\text{Cd}_{20}$ , orange dashes the ones of  $\text{RhCd}_{9+\delta}$ .

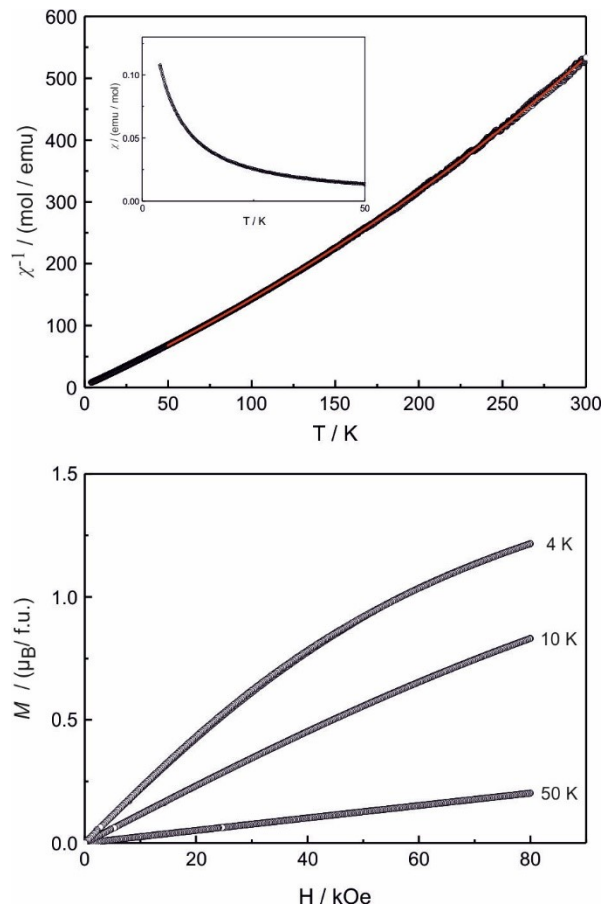

**Figure S18** Magnetic data of  $\text{CeRh}_2\text{Cd}_{20}$ : Zero field cooled / field cooled (ZFC/FC) measurements at an applied field of 100 Oe (inset), inverse susceptibilities measured at 10 kOe; the red line emphasizes the fit regime (top) and magnetization isotherms recorded at 4, 10 and 50 K.

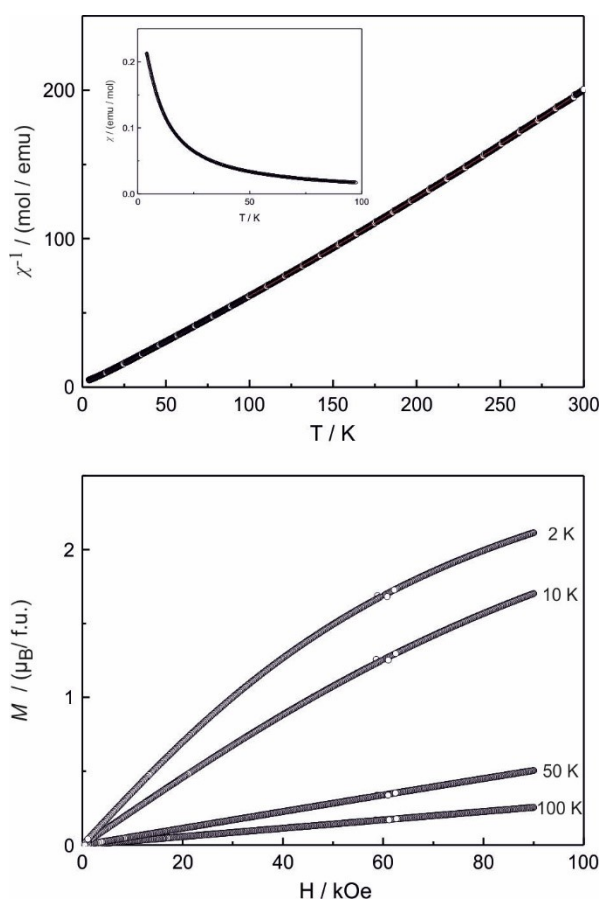

**Figure S19** Magnetic data of  $\text{PrRh}_2\text{Cd}_{20}$ : Zero field cooled / field cooled (ZFC/FC) measurements at an applied field of 100 Oe (inset), inverse susceptibilities measured at 10 kOe (top) and magnetization isotherms recorded at 2, 10, 50 and 100 K.

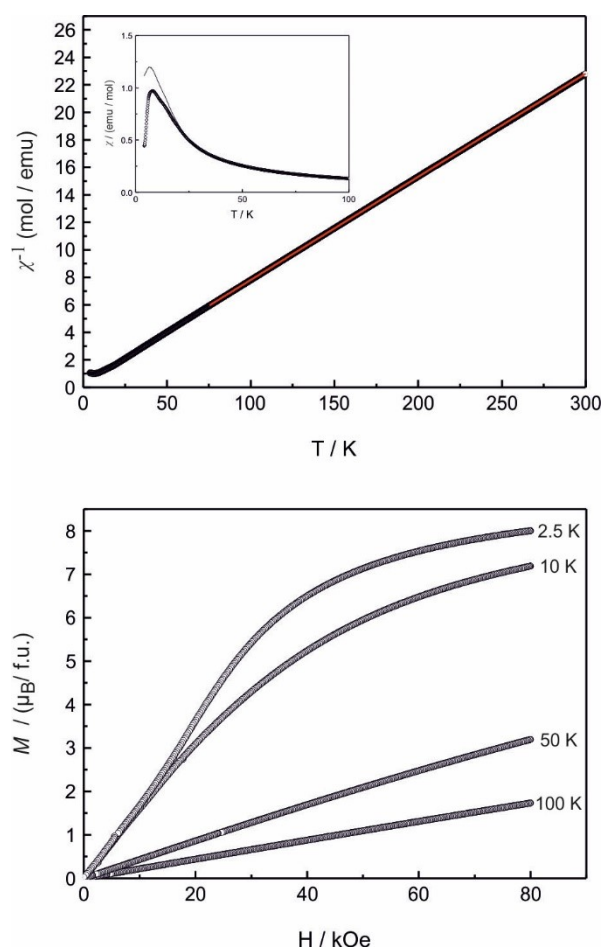

**Figure S20** Magnetic data of  $\text{TbRh}_2\text{Cd}_{20}$ : Zero field cooled / field cooled (ZFC/FC) measurements at an applied field of 100 Oe (inset), inverse susceptibilities measured at 10 kOe; the red line emphasizes the fit regime (top) and magnetization isotherms recorded at 2.5, 10, 50 and 100 K.

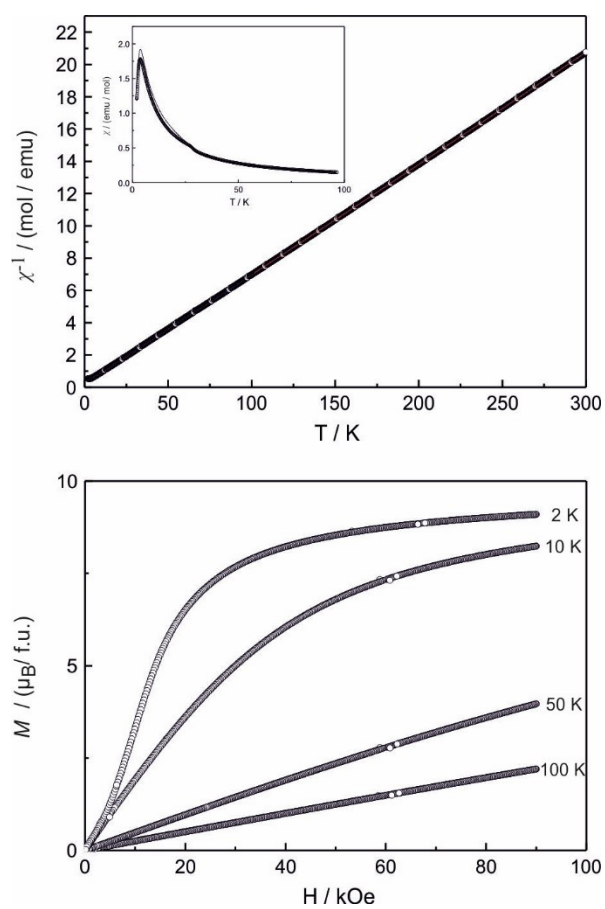

**Figure S21** Magnetic data of  $\text{DyRh}_2\text{Cd}_{20}$ : Zero field cooled / field cooled (ZFC/FC) measurements at an applied field of 100 Oe (inset), inverse susceptibilities measured at 10 kOe (top) and magnetization isotherms recorded at 2, 10, 50 and 100 K.

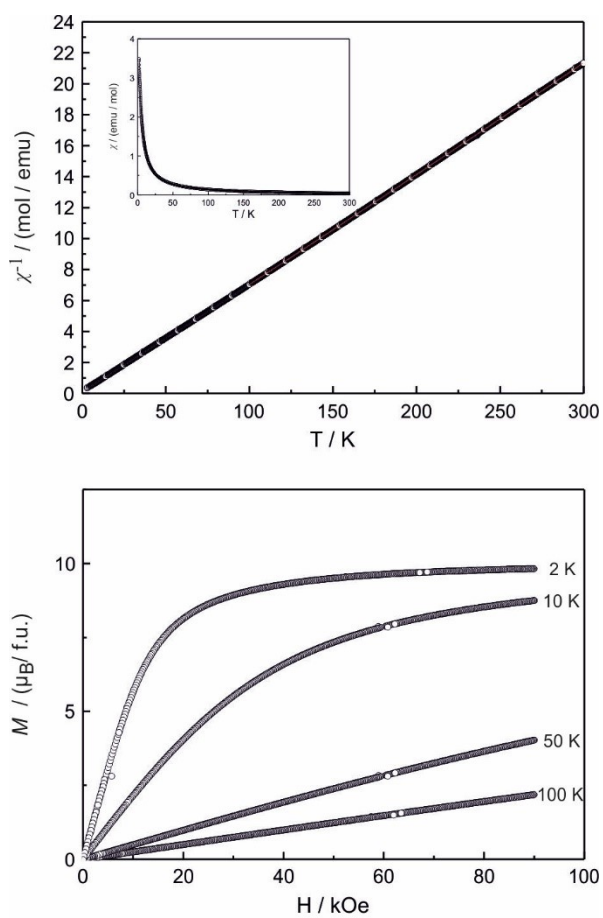

**Figure S22** Magnetic data of  $\text{HoRh}_2\text{Cd}_{20}$ : Zero field cooled / field cooled (ZFC/FC) measurements at an applied field of 100 Oe (inset), inverse susceptibilities measured at 10 kOe (top) and magnetization isotherms recorded at 2, 10, 50 and 100 K.



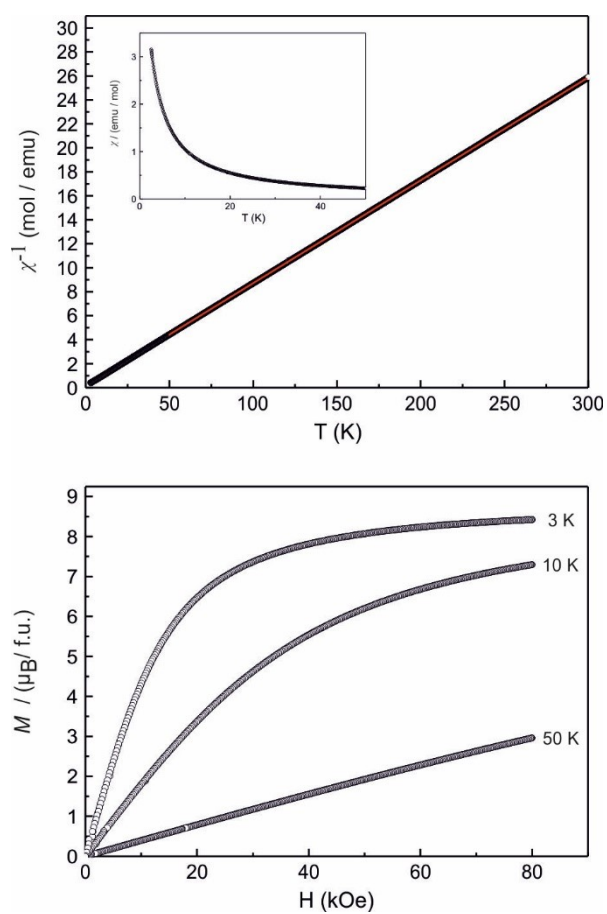

**Figure S23** Magnetic data of  $\text{ErRh}_2\text{Cd}_{20}$ : Zero field cooled / field cooled (ZFC/FC) measurements at an applied field of 100 Oe (inset), inverse susceptibilities measured at 10 kOe; the red line emphasizes the fit regime (top) and magnetization isotherms recorded at 3, 10 and 50 K.

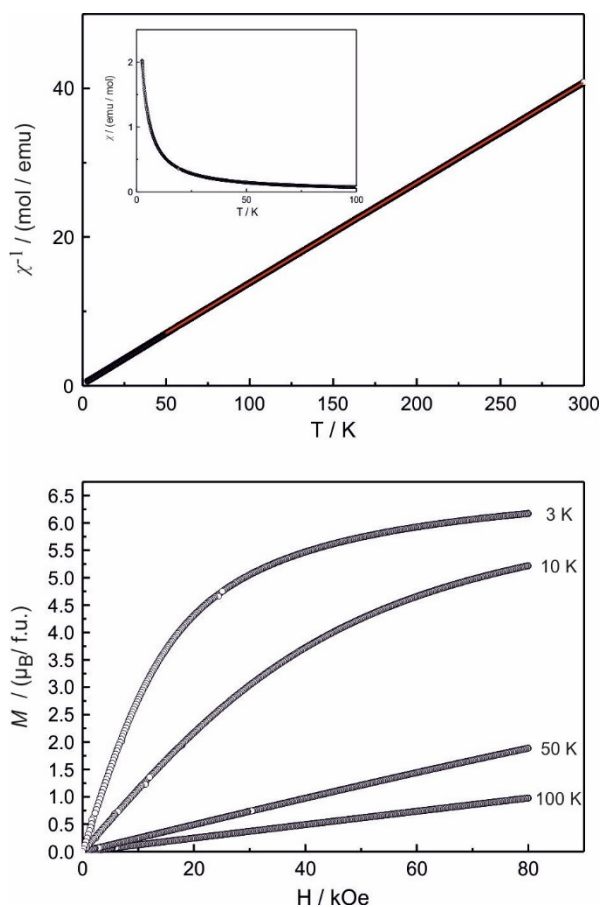

**Figure S24** Magnetic data of  $\text{TmRh}_2\text{Cd}_{20}$ : Zero field cooled / field cooled (ZFC/FC) measurements at an applied field of 100 Oe (inset), inverse susceptibilities measured at 10 kOe; the red line emphasizes the fit regime (top) and magnetization isotherms recorded at 3, 10, 50 and 100 K.

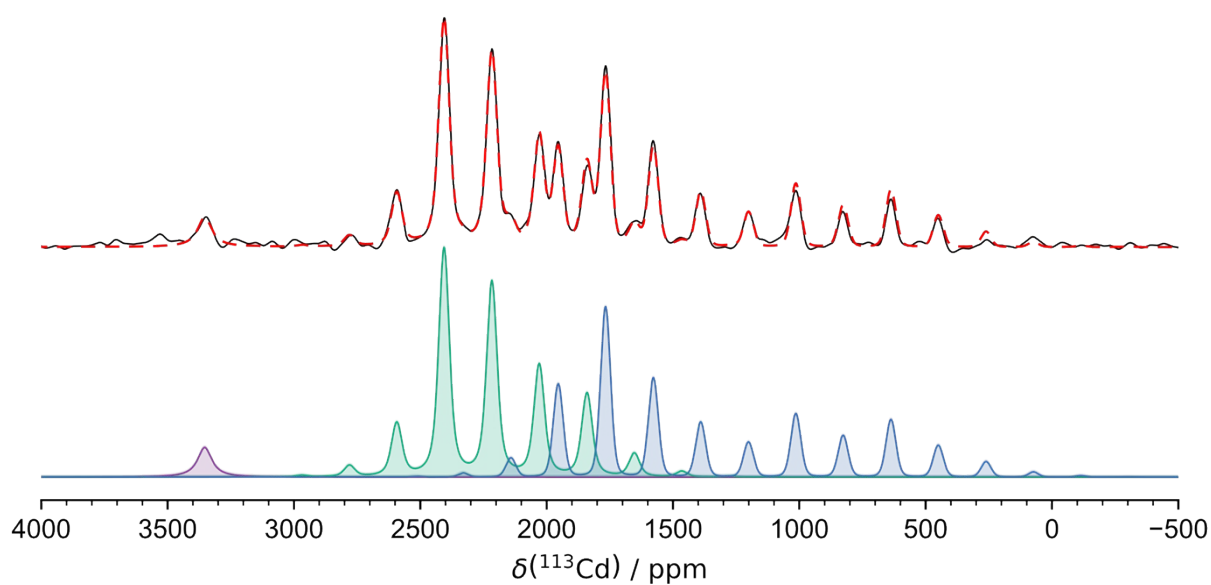

**Figure S25**  $^{113}\text{Cd}$  WCPMG-MAS NMR spectrum of  $\text{YRh}_2\text{Cd}_{20}$  recorded in 2048 scans with 80 echoes of which 12 were processed, each spanning 9 rotor periods at a MAS frequency of 12.5 kHz and 8.0 s recycle delay. The three shadings indicate the three crystallographically independent cadmium sites (see Tables 6 and S1).

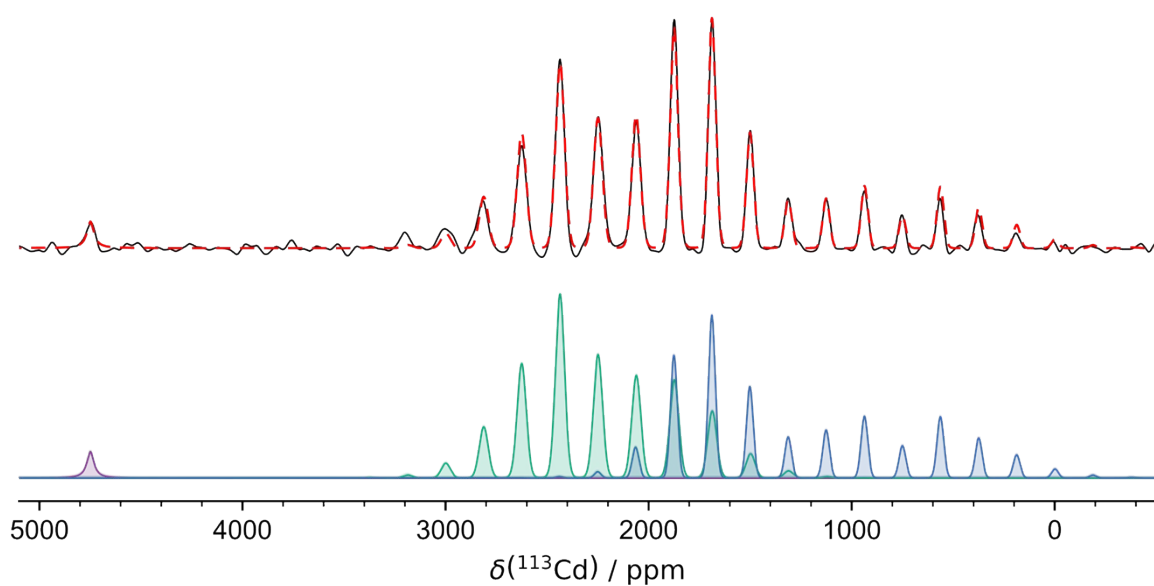

**Figure S26**  $^{113}\text{Cd}$  WCPMG-MAS NMR spectrum of  $\text{LaRh}_2\text{Cd}_{20}$  recorded in 8192 scans with 80 echoes of which 12 were processed, each spanning 7 rotor periods at a MAS frequency of 12.5 kHz and 8.0 s recycle delay. The three shadings indicate the three crystallographically independent cadmium sites (see Tables 6 and S1).

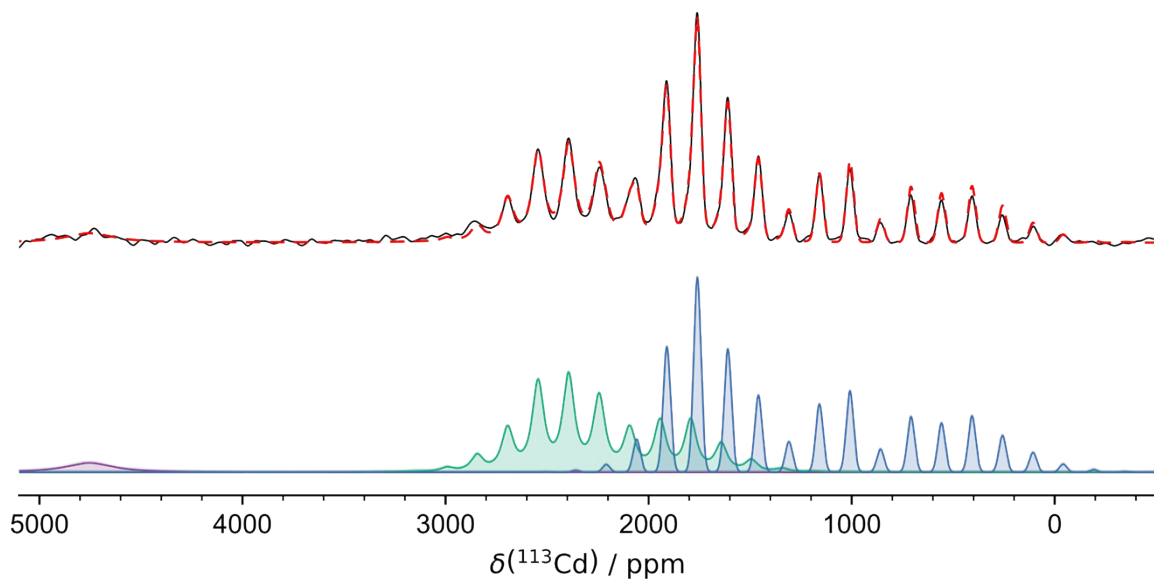

**Figure S27**  $^{113}\text{Cd}$  WCPMG-MAS NMR spectrum of  $\text{LaRh}_2\text{Cd}_{20}$  recorded in 32768 scans with 80 echoes of which 12 were processed, each spanning 7 rotor periods at a MAS frequency of 10.0 kHz and 8.0 s recycle delay. The three shadings indicate the three crystallographically independent cadmium sites (see Tables 6 and S1).

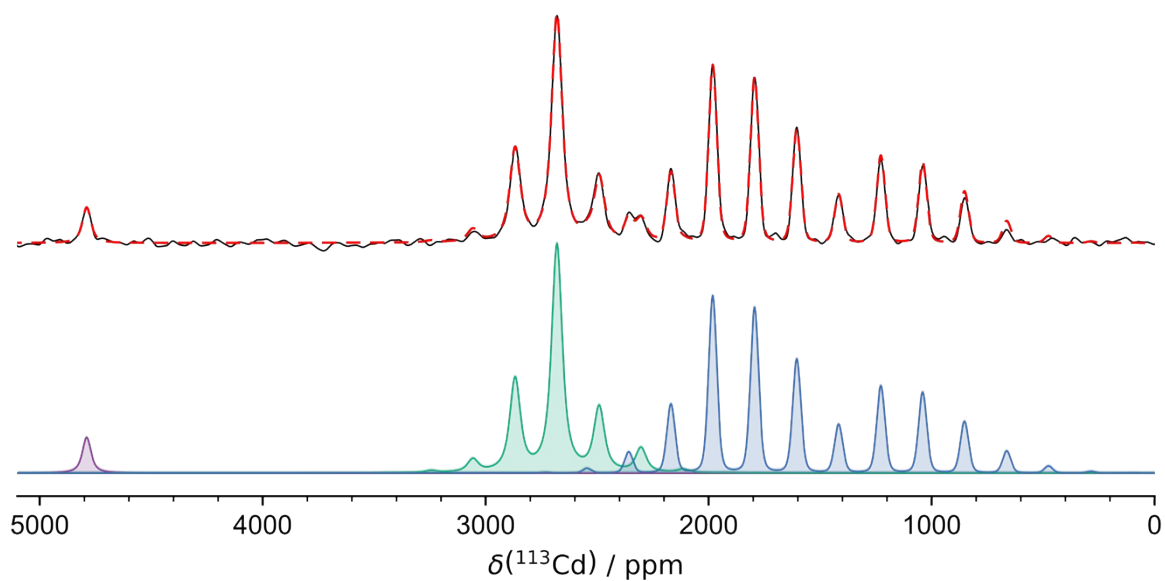

**Figure S28**  $^{113}\text{Cd}$  WCPMG-MAS NMR spectrum of  $\text{YbRh}_2\text{Cd}_{20}$  recorded in 2048 scans with 80 echoes of which 10 were processed, each spanning 9 rotor periods at a MAS frequency of 12.5 kHz and 8.0 s recycle delay. The three shadings indicate the three crystallographically independent cadmium sites (see Tables 6 and S1).

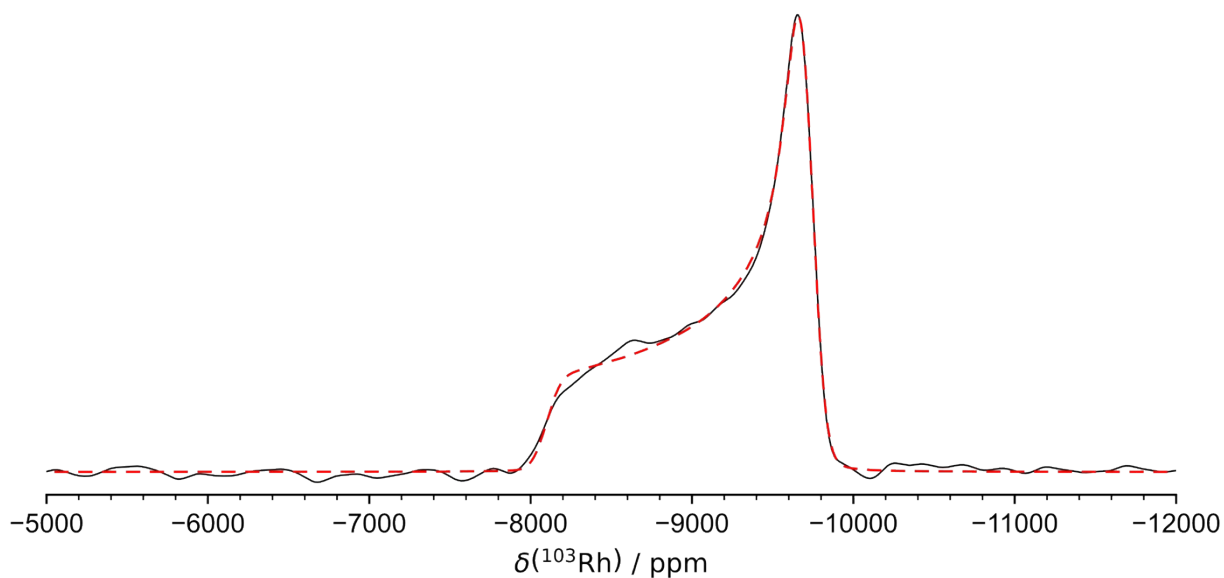

**Figure S29**  $^{103}\text{Rh}$  WCPMG NMR spectrum of  $\text{YRh}_2\text{Cd}_{20}$  recorded in 32768 scans with 80 echoes and 2.0 s recycle delay. The fit is shown as red dashed line.

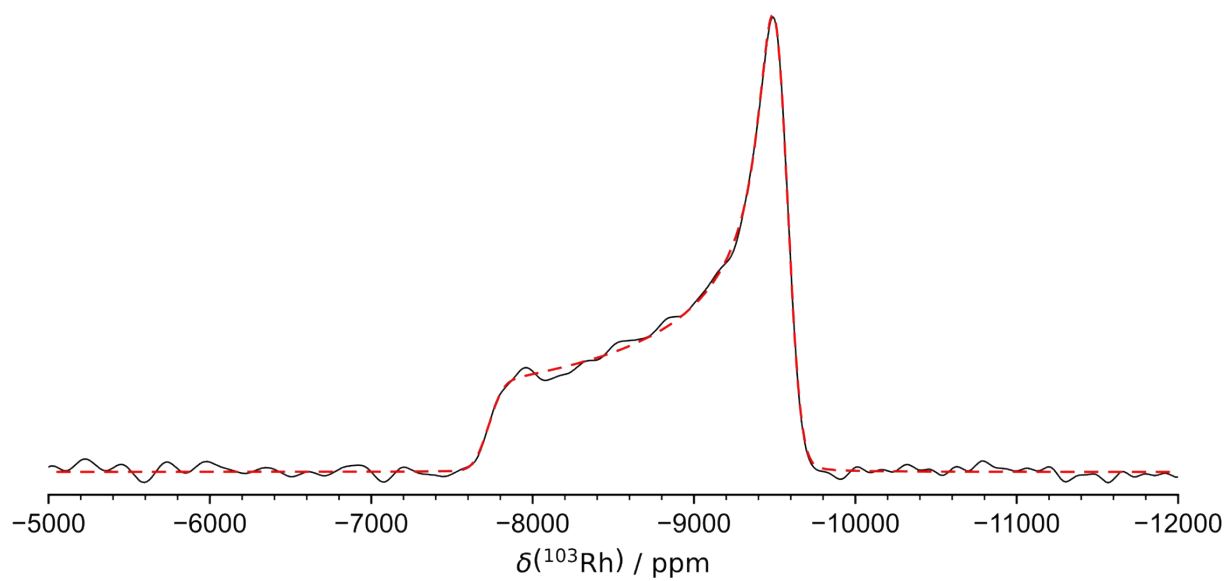

**Figure S30**  $^{103}\text{Rh}$  WCPMG NMR spectrum of  $\text{LaRh}_2\text{Cd}_{20}$  recorded in 32768 scans with 80 echoes and 2.0 s recycle delay. The fit is shown as red dashed line.

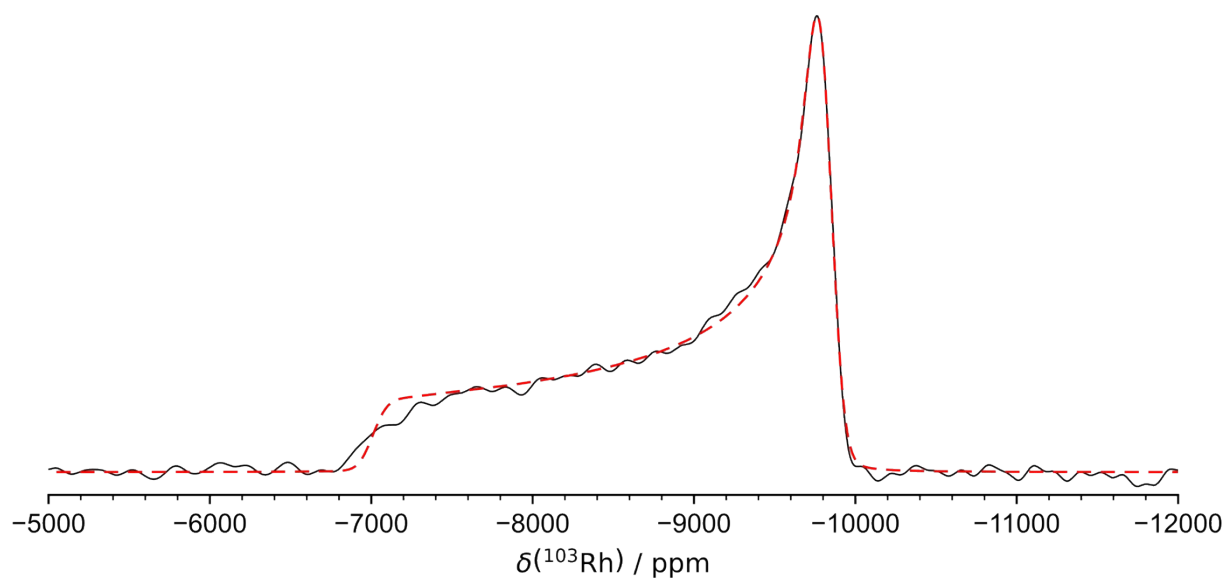

**Figure S31**  $^{103}\text{Rh}$  WCPMG NMR spectrum of  $\text{YbRh}_2\text{Cd}_{20}$  recorded in 32768 scans with 80 echoes and 2.0 s recycle delay. The fit is shown as red dashed line.
